# Supplementary material for: High surface area mesoporous CuO: a high-performance electrocatalyst for non-enzymatic glucose biosensing
Source: Royal Society of Chemistry journal article supplement (doi:10.1039/c4ra04700a), 2014-01-01
Supplement: c4ra04700a1.pdf [file c4ra04700a1.pdf]

## Supporting Information

### High surface area mesoporous CuO: A high-performance electrocatalyst for non-enzymatic glucose biosensing

Sen Liu, Ziyang Wang, Fengjiao Wang, Bo Yu, and Tong Zhang\*

State Key Laboratory on Integrated Optoelectronics, College of Electronic Science and Engineering, Jilin University, Changchun 130012, P. R. China

\*Corresponding author:

E-mail address: zhangtong@jlu.edu.cn (T. Zhang)

Tel.: +86 431 85168385; Fax: +86 431 85168270.

#### Experimental section

##### Materials

$\text{Cu}(\text{NO}_3)_2 \cdot 3\text{H}_2\text{O}$ , glucose,  $\text{H}_2\text{SO}_4$  (98 %), NaOH, HCl, sucrose, chitosan, acetic acid, ethanol, ascorbic acid (AA), and uric acid (UA) were purchased from Beijing Chemical Comp. Tetraethyl orthosilicate (TEOS) was purchased from Tianjin Chemical Co. Pluronic P123 ( $\text{EO}_{20}\text{PO}_{70}\text{EO}_{20}$ ,  $M = 5800$ ) was purchased from Aldrich. All chemicals were used as received without further purification. The water used throughout all experiments was purified through a Millipore system.

##### Preparation of SBA-15

SBA-15 was prepared by using P123 as soft template and TEOS as silica source

according to our previous report.<sup>1</sup> In a typical run, 1 g of P123 was dissolved in 25 mL of HCl solution (2 M). After that, the mixture was heated to 45 °C, followed by addition of 4.5 mL of TEOS. After further stirring for 12 h, the gel was transferred into a Teflon-lined autoclave and heated at 100 °C for 48 h. After filtration, drying at room temperature, and calcination in air at 550 °C for 3 h, SBA-15 was obtained.

### **Preparation of CMK-3**

CMK-3 was prepared by using SBA-15 as hard template according to previous report.<sup>2</sup> In a typical run, 1 g of SBA-15 was added into 5 mL of H<sub>2</sub>O, followed by addition of 1.25 g of sucrose and 0.14 g of H<sub>2</sub>SO<sub>4</sub>. After stirring for 5 h, the result viscous mixture was placed in a drying oven at 100 °C for 6 h and subsequently the increasing the oven temperature to 160 °C and maintaining for 6 h. After that, the mixture was mixed with 5 mL of H<sub>2</sub>O consisting of 0.75 g of sucrose, 0.09 g of H<sub>2</sub>SO<sub>4</sub>, followed by heating at 160 °C again. Then, the obtained mixture was pyrolyzed at 900 °C under a nitrogen atmosphere for 4 h. Finally, the carbon/silica composite obtained after pyrolysis was washed with 1 M NaOH solution (an EtOH-H<sub>2</sub>O mixture) to remove the silica template.

### **Preparation of mesoporous CuO**

Mesoporous CuO was prepared by the nanocasting method using CMK-3 as hard template according to the published report.<sup>3</sup> In a typical synthesis, 1 g of CMK-3 was dispersed in 10 mL of H<sub>2</sub>O, followed by addition of 0.97 g of Cu(NO<sub>3</sub>)<sub>2</sub>·3H<sub>2</sub>O. Then the mixture was heated to 100 °C and stirred for 2 h. The resultant sample was dried under vacuum to give a fine and completely dry powder. After that, the mixture was

heated in a tube furnace under nitrogen to 300 °C at a constant rate of 1 °C min<sup>-1</sup> and maintained for 4 h to convert the Cu(NO<sub>3</sub>)<sub>2</sub>·3H<sub>2</sub>O within the pores to CuO. This procedure was repeated twice. Finally, the sample was calcined in air at 500 °C for 10 h to remove the carbon.

### **Characterizations**

Powder X-ray diffraction (XRD) data were recorded on a RigakuD/MAX 2550 diffractometer with Cu-K $\alpha$  radiation ( $\lambda=1.5418$  Å). Nitrogen isotherm was obtained at -196 °C on a Micromeritics Tri-star. Samples were prepared for measurement by treating at 150 °C under nitrogen atmosphere for 12 h. Pore size distributions were calculated using Barrett-Joyner-Halenda (BJH) method. The morphology of the samples was observed by field emission scanning electron microscopy (FE-SEM) on a JSM-6700F electron microscope (JEOL, Japan). Electrochemical measurements were performed with a CHI 660D electrochemical analyzer (CH Instruments, Inc., Shanghai). A conventional three-electrode cell was used, including a glassy carbon electrode (GCE, geometric area = 0.07 cm<sup>2</sup>) as the working electrode, a Ag/AgCl (saturated KCl) electrode as the reference electrode, and platinum foil as the counter electrode. The potentials are measured with a Ag/AgCl electrode as the reference electrode. All the experiments were carried out at room temperature.

### **Detection of glucose**

The modified electrodes were prepared by a simple casting method. Prior to the surface coating, the GCE was polished with 1.0 and 0.3  $\mu$ m alumina powder, respectively, and rinsed with water, followed by sonication in ethanol solution and

water successively. Then, the electrode was allowed to dry in a stream of nitrogen. After that, 1.5  $\mu\text{L}$  of mesoporous CuO aqueous dispersion (5 mg/mL) and 1  $\mu\text{L}$  of chitosan solution (in 1 % acetic acid aqueous solution) were dropped on the clean surface of GCE, and dried at room temperature. The amperometric measurements were carried out in a glass cell containing a buffer solution (5 mL) with constant stirring (500 rpm).

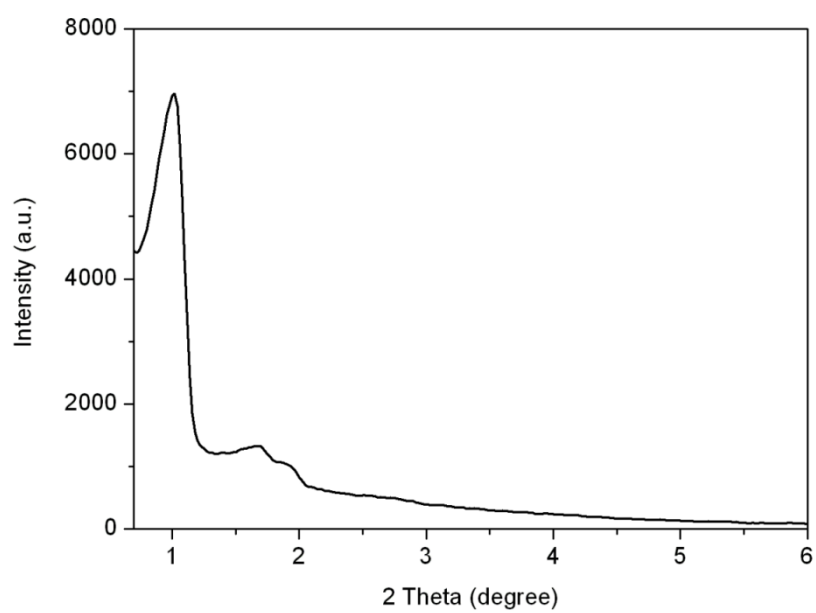

**Fig. S1** Small-angle XRD pattern of SBA-15 after calcination in air at 550 °C for 3 h.

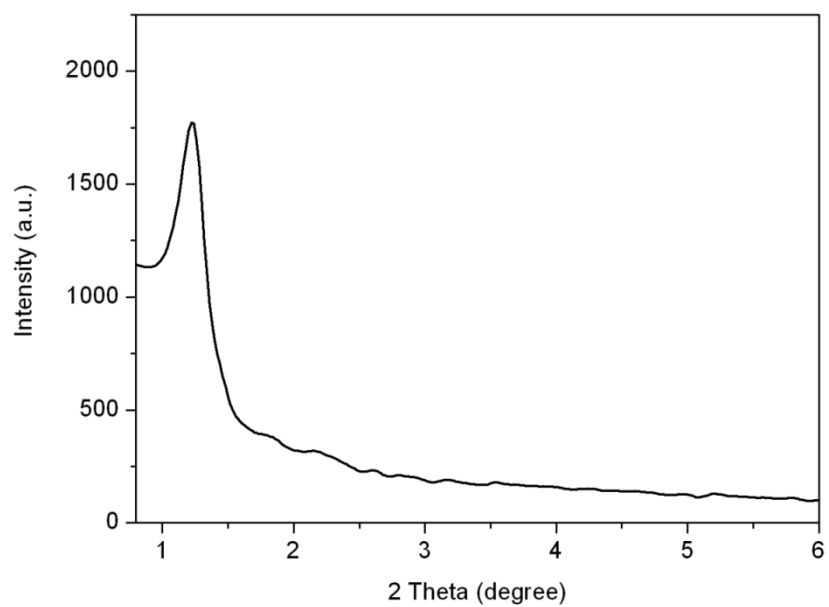

**Fig. S2** Small-angle XRD pattern of CMK-3 calcination in N<sub>2</sub> at 900 °C for 4 h.

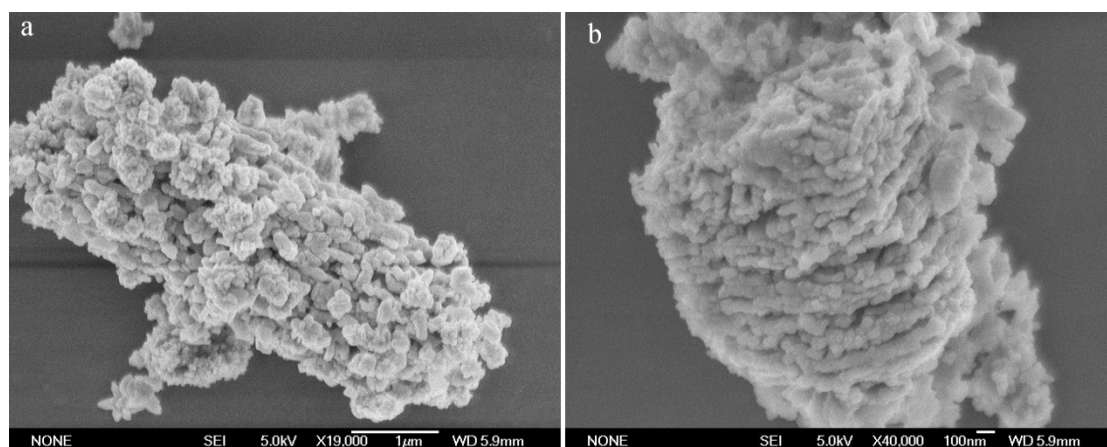

**Fig. S3** (a) Low magnification and (b) high magnification SEM images of mesoporous CuO thus obtained.

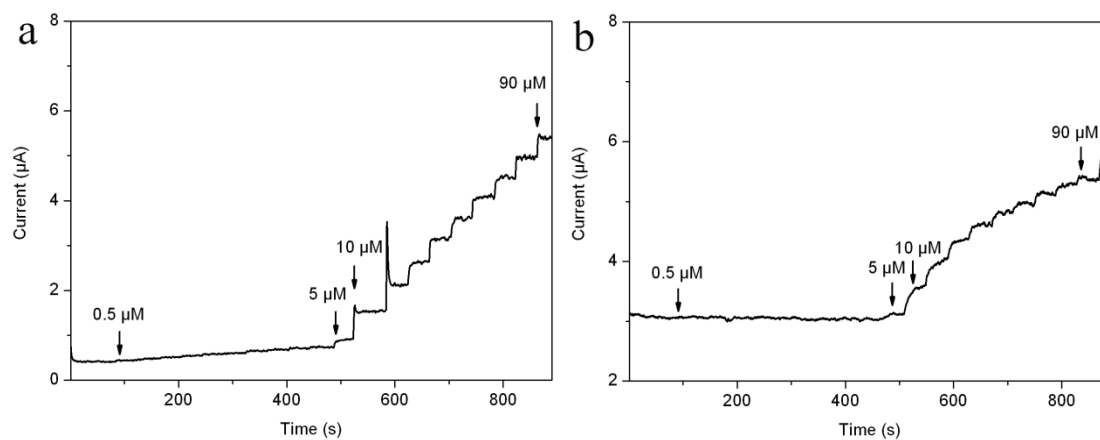

**Fig. S5** Typical steady-state responses of the CuO/GCE to successive injection of glucose into the 0.1 M NaOH solution under stirring with applied potential at (a) +0.5 V and (b) +0.7 V.

## References:

- 1 S. Liu, H. Zhang, X. Meng, Y. Zhang, L. Ren, F. Nawaz, J. Liu, Z. Li and F.-S. Xiao, *Micropor. Mesopor. Mater.*, 2010, **136**, 126-131.
- 2 L. Wang, S. Lin, K. Lin, C. Yin, D. Liang, Y. Di, P. Fan, D. Jiang and F.-S. Xiao, *Micropor. Mesopor. Mater.*, 2005, **85**, 136-142.
- 3 X. Lai, X. Li, W. Geng, J. Tu, J. Li and S. Qiu, *Angew. Chem. Int. Ed.*, 2007, **46**, 738-741.
